# Supplementary material for: Biological activity and coordination modes of copper(ii) complexes of Schiff base-derived coumarin ligands
Source: Royal Society of Chemistry journal article supplement (doi:10.1039/c0dt00068j), 2010-01-01
Supplement: c0dt00068j.pdf [file c0dt00068j.pdf]

## Supplementary Information

**Table S1** Selected IR data ( $\text{cm}^{-1}$ ) for the secondary amines **3a-k** recorded as KBr discs

| amine      | $\nu(\text{N-H}) \text{ cm}^{-1}$<br>stretching | $\nu(\text{N-H}) \text{ cm}^{-1}$<br>bending | $\nu(\text{O-H}) \text{ cm}^{-1}$ | $\nu(\text{C-H}) \text{ cm}^{-1}$ | $\nu(\text{C-N}) \text{ cm}^{-1}$ | lactone<br>$\nu(\text{C=O}) \text{ cm}^{-1}$ | phenolic<br>$\nu(\text{C-O}) \text{ cm}^{-1}$ |
|------------|-------------------------------------------------|----------------------------------------------|-----------------------------------|-----------------------------------|-----------------------------------|----------------------------------------------|-----------------------------------------------|
| <b>3a</b>  | 3346                                            | 1529                                         | -na-                              | 2922                              | 1086                              | 1663                                         | 1226                                          |
| <b>3b</b>  | 3375                                            | 1479                                         | 3220                              | -na-                              | 1075                              | 1649                                         | 1281                                          |
| <b>3c*</b> | -                                               | -                                            | -                                 | -                                 | -                                 | -                                            | -                                             |
| <b>3d</b>  | 3331                                            | 1529                                         | -na-                              | 3006                              | 1069                              | 1686                                         | 1268                                          |
| <b>3e</b>  | 3351                                            | 1528                                         | -na-                              | 2981                              | 1051                              | 1700                                         | 1268                                          |
| <b>3f*</b> | -                                               | -                                            | -                                 | -                                 | -                                 | -                                            | -                                             |
| <b>3g</b>  | 3367                                            | 1464                                         | 3267                              | 3104                              | 1065                              | 1681                                         | 1269                                          |
| <b>3h</b>  | 3401                                            | 1460                                         | 3261                              | 3099                              | 1008                              | 1682                                         | 1228                                          |
| <b>3i</b>  | 3382                                            | 1444                                         | 3272                              | 3083                              | 1006                              | 1678                                         | 1292                                          |
| <b>3j</b>  | 3364                                            | 1521                                         | 3198                              | -na-                              | 1075                              | 1663                                         | 1285                                          |
| <b>3k</b>  | 3483                                            | 1518                                         | -na-                              | 3102                              | 1066                              | 1698                                         | 1286                                          |

\*compounds not isolated, -na- = not assigned

**Table S2** Characteristic  $^1\text{H-NMR}$  signals (ppm), peak multiplicity and coupling constants  $J$  (Hz) for the secondary amines **3a-3k** recorded in  $\text{d}_6\text{-DMSO}$

| amine      | H3<br>(vinyl) | H5               | H6                       | H11<br>(CH <sub>3</sub> ) | H12<br>(-NH-) | H13<br>(-CH <sub>2</sub> -) | H15<br>(OH) | R <sub>1</sub>                                    | R <sub>2</sub>           | R <sub>3</sub>   |
|------------|---------------|------------------|--------------------------|---------------------------|---------------|-----------------------------|-------------|---------------------------------------------------|--------------------------|------------------|
| <b>3a</b>  | 5.88, s       | 7.41, d, $J=8.8$ | 6.63, dd, $J=8.7, J=2.2$ | 2.28, s                   | 7.05, t       | 4.25, d, $J=5.9$            | 9.59, s     | 6.83, d, $J=8.1$                                  | 7.07, t, $J=7.0$         | 6.73, t, $J=7.5$ |
| <b>3b</b>  | 5.87, s       | 7.40, d, $J=8.8$ | m                        | 2.27, s                   | 7.00, t       | 4.25, d, $J=5.9$            | 9.26, s     | 8.44, s(-OH)                                      | m                        | m                |
| <b>3c*</b> | -             | -                | -                        | -                         | -             | -                           | -           | -                                                 | -                        | -                |
| <b>3d</b>  | 5.83, s       | 7.40, d, $J=8.8$ | 6.62, dd, $J=8.6, J=1.9$ | 2.28, s                   | 7.04, t       | 4.27, d, $J=5.9$            | 8.76, s     | 3.79, s, (-OCH <sub>3</sub> )                     | 6.84, dd, $J=7.7, J=2.4$ | 6.79, t, $J=7.5$ |
| <b>3e</b>  | 5.87, s       | 7.40, d, $J=8.6$ | m                        | 2.28, s                   | 7.04, t       | 4.28, d, $J=5.9$            | 8.56, s     | 4.05, q, (-OCH <sub>2</sub> ) 1.34, t, (-         | m                        | m                |
| <b>3f*</b> | -             | -                | -                        | -                         | -             | -                           | -           | CH <sub>3</sub> )                                 | -                        | -                |
| <b>3g</b>  | 5.94, s       | 7.46, d, $J=8.6$ | 6.63, dd, $J=8.8, J=2.2$ | 2.30, s                   | 7.17, t       | 4.35, d, $J=5.9$            | 9.85, s     | -                                                 | 7.41, d, $J=2.6$         | -Cl              |
| <b>3h</b>  | 5.91, s       | 7.44, d, $J=8.6$ | 6.62, dd, $J=8.6, J=2.2$ | 2.24, s                   | 7.12, t       | 4.35, d, $J=6.2$            | 9.65, s     | -Cl                                               | 7.60, d, $J=2.6$         | -Br              |
| <b>3i</b>  | 5.94, s       | 7.42, d, $J=7.1$ | 6.62, dd, $J=8.8, J=2.0$ | 2.29, s                   | 7.07, t       | 4.32, d, $J=5.5$            | 9.51, s     | -Br                                               | 7.88, s                  | -I               |
| <b>3j</b>  | 5.93, s       | 7.44, d, $J=8.8$ | 6.67, dd, $J=8.8, J=2.2$ | 2.30, s                   | 7.27, t       | 4.35, d, $J=5.7$            | 11.45, s    | -I                                                | 8.06, dd, $J=7.3, J=3.0$ | -NO <sub>2</sub> |
| <b>3k</b>  | 5.92, s       | 7.45, d, $J=8.8$ | 6.65, dd, $J=8.7, J=2.2$ | 2.35, s                   | 7.28, t       | 4.37, d, $J=5.9$            | 10.69, s    | 7.03, d, $J=8.4$<br>3.95, s, (-OCH <sub>3</sub> ) | 7.70, $J=2.6$            | -NO <sub>2</sub> |

(s = singlet, d = doublet, t = triplet, dd = double-doublet, m – multiplet)

\* not isolated

**Table S3** Characteristic  $^{13}\text{C}$ -NMR signals (ppm), peak multiplicity and coupling constants  $J$  (Hz) for the secondary amines **3a-3k** recorded in  $\text{d}_6$ -DMSO

| amine     | C2<br>(lactone) | C3<br>(vinyl) | C4    | C5    | C6    | C7    | C8   | C9    | C10   | C11<br>(methyl) | C13<br>(amine) | C14   | C15<br>(phenol) | C16   | C17   | C18   | C19   |
|-----------|-----------------|---------------|-------|-------|-------|-------|------|-------|-------|-----------------|----------------|-------|-----------------|-------|-------|-------|-------|
| <b>3a</b> | 157.3           | 102.6         | 155.9 | 121.1 | 110.2 | 147.7 | 91.8 | 150.8 | 119.9 | 13.2            | 35.7           | 123.6 | 150.3           | 148.9 | 114.1 | 123.1 | 121.1 |
| <b>3b</b> | 155.9           | 102.6         | na*   | 121.1 | 104.0 | 140.2 | 97.8 | 150.8 | 109.3 | 13.2            | 36.2           | 138.4 | 148.9           | 147.7 | 105.6 | 120.8 | 114.0 |
| <b>3c</b> | -               | -             | -     | -     | -     | -     | -    | -     | -     | -               | -              | -     | -               | -     | -     | -     | -     |
| <b>3d</b> | 160.7           | 107.5         | 153.8 | 125.9 | 110.3 | 147.4 | 96.5 | 155.5 | 108.8 | 18.0            | 40.7           | 125.2 | 144.0           | 153.7 | 110.6 | 118.7 | 120.2 |
| <b>3e</b> | 160.6           | 107.4         | 153.6 | 125.8 | 110.3 | 144.2 | 96.5 | 152.4 | 108.7 | 17.9            | 40.7           | 125.2 | 155.5           | 146.4 | 120.2 | 118.7 | 111.7 |
| <b>3f</b> | -               | -             | -     | -     | -     | -     | -    | -     | -     | -               | -              | -     | -               | -     | -     | -     | -     |
| <b>3g</b> | 160.6           | 107.9         | 153.7 | 126.2 | 123.3 | 155.5 | 96.6 | 149.6 | 109.3 | 18.0            | 41.1           | 130.2 | 151.9           | 110.2 | 127.3 | 121.8 | 126.4 |
| <b>3h</b> | 160.8           | 111.6         | 153.9 | 126.4 | 110.5 | 151.3 | 97.1 | 152.1 | 109.5 | 18.2            | 41.6           | 130.1 | 155.7           | 108.2 | 133.1 | 112.7 | 130.9 |
| <b>3i</b> | 160.6           | 108.0         | 153.7 | 126.1 | 110.3 | 151.9 | 96.9 | 155.5 | 109.3 | 18.0            | 41.6           | 129.5 | 154.1           | 90.3  | 144.1 | 83.8  | 136.5 |
| <b>3j</b> | 161.7           | 107.9         | 153.7 | 126.2 | 111.3 | 152.0 | 96.6 | 155.5 | 109.2 | 18.0            | 40.3           | 139.6 | 160.6           | 115.3 | 124.6 | 126.4 | 123.9 |
| <b>3k</b> | 160.6           | 107.9         | 153.7 | 126.2 | 111.1 | 151.9 | 96.6 | 151.0 | 109.2 | 18.0            | 40.3           | 125.8 | 147.1           | 155.5 | 105.6 | 139.2 | 116.5 |

\* na - not assigned (assignment impossible due to high levels of noises)

**Table S4** Crystal data and structure refinement for the Schiff base **1e**

|                                   |                                                                                                          |
|-----------------------------------|----------------------------------------------------------------------------------------------------------|
| Empirical formula                 | C <sub>19</sub> H <sub>17</sub> NO <sub>4</sub>                                                          |
| Formula weight                    | 323.36                                                                                                   |
| Temperature                       | 85 (2) K                                                                                                 |
| Wavelength                        | 0.71073 Å                                                                                                |
| Crystal system                    | monoclinic                                                                                               |
| Space group                       | P2(1)/n                                                                                                  |
| Unit cell dimensions              | a = 11.8125(13) Å     α = 90°<br>b = 11.1729(13) Å     β = 103.765(6) °<br>c = 11.8630(13) Å     γ = 90° |
| Volume                            | 1520.7(3) Å <sup>3</sup>                                                                                 |
| Z                                 | 4                                                                                                        |
| Density (calculated)              | 1.412 Mg/m <sup>3</sup>                                                                                  |
| Absorption coefficient            | 0.100 mm <sup>-1</sup>                                                                                   |
| Crystal size                      | 0.48 x 0.26 x 0.24 mm <sup>3</sup>                                                                       |
| Index ranges                      | -14 ≤ h ≤ 14<br>-14 ≤ k ≤ 13<br>-14 ≤ l ≤ 14                                                             |
| Theta range for data collection   | 2.19 to 26.47°                                                                                           |
| Reflections collected             | 29052                                                                                                    |
| Independent reflections           | 3139 [R(int) = 0.0272]                                                                                   |
| Completeness to theta = 26.42°    | 99.8 %                                                                                                   |
| Max. and min. transmission        | 0.9765 and 0.9537                                                                                        |
| Refinement method                 | Full-matrix least-squares on F <sup>2</sup>                                                              |
| Data / restraints / parameters    | 3139 / 0 / 220                                                                                           |
| Goodness-of-fit on F <sup>2</sup> | 1.033                                                                                                    |
| Final R indices [I > 2σ(I)]       | R1 = 0.0327, wR2 = 0.0899                                                                                |
| R indices (all data)              | R1 = 0.0340, wR2 = 0.0915                                                                                |
| Largest diff. peak and hole       | 0.317 and -0.230 e.Å <sup>-3</sup>                                                                       |

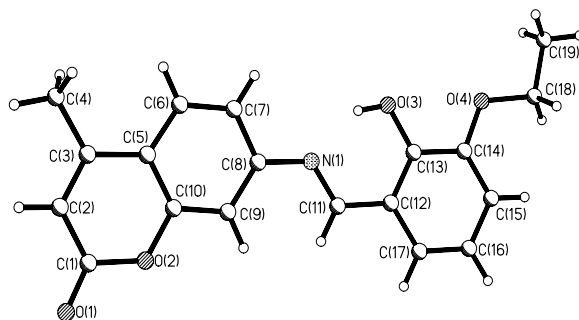

**Fig. S1.** Structure showing X-ray crystallography atom labelling of Schiff base **1e**

The structure of **1e** was very similar to that previously reported for **1a**. [1]. A single unit cell of each structure contains four molecules. Whilst the Schiff base molecules themselves are not planar the coumarin moieties and the phenolic rings of diagonally located molecules are co-planar. There is also a centre of symmetry in the middle of the cell. Both crystal structures exhibit 4-fold rotational symmetry around all three axes. The location of the imine bond between the coumarin and phenolic ring systems allows for *cis* or *trans* conformations and both structures reveal that the respective ring systems are *trans* to each other. In addition both crystal structures revealed the presence of an intermolecular hydrogen bond between the imine nitrogen and the phenolic hydrogen of the salicylaldehyde-derived moiety. The crystal structure of **1a** has been previously reported by Aazam et al. and our results concurred with their structure

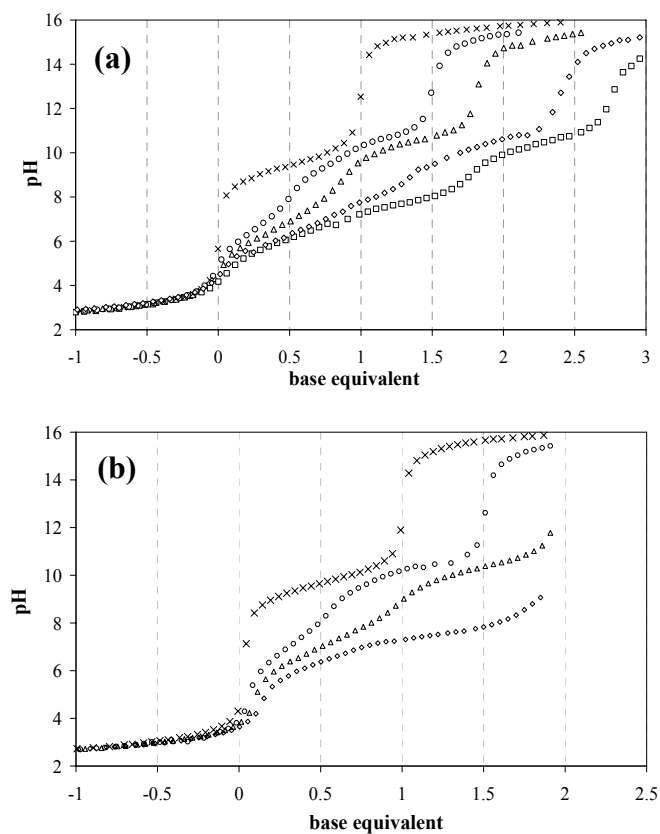

**Fig. S2.** The pH-potentiometric titration curves in 80 %(w/w) DMSO/water at various metal to ligand ratios for (a) the Cu(II) – **1e** system (x: **1e**; O: 1:3.4; Δ: 1:2; ◇: 1: 1.4; □: 1:1.1) and (b) the Cu(II) - salicylaldehyde system (x: ligand; O: 1:4; Δ: 1:2.2; ◇: 1: 1). The ligand concentration was 1.0 mM; I = 0.1 M (KCl);  $t=25.0$  °C; base equivalent =  $[V_{\text{KOH}} \times c_{\text{KOH}} - n_{\text{added}}(\text{HCl})]/n(\text{ligand})$ ; negative base equivalent values mean acid excess.

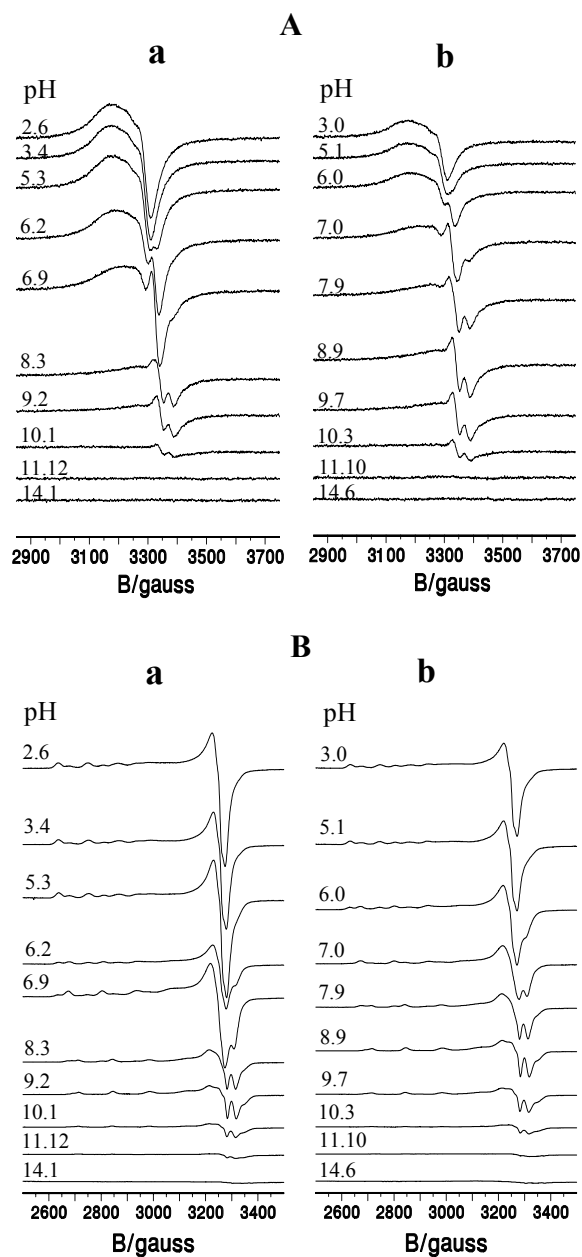

**Fig. S3.** ESR spectra for the Cu(II) – 1a equilibrium system A) in liquid solution at 298 K and B) in frozen solution at 77 K; a)  $T_{Cu}=1\text{mM}$ ,  $T_L=1\text{mM}$ ; b)  $T_{Cu}=0.5\text{mM}$ ,  $T_L=1\text{mM}$ .

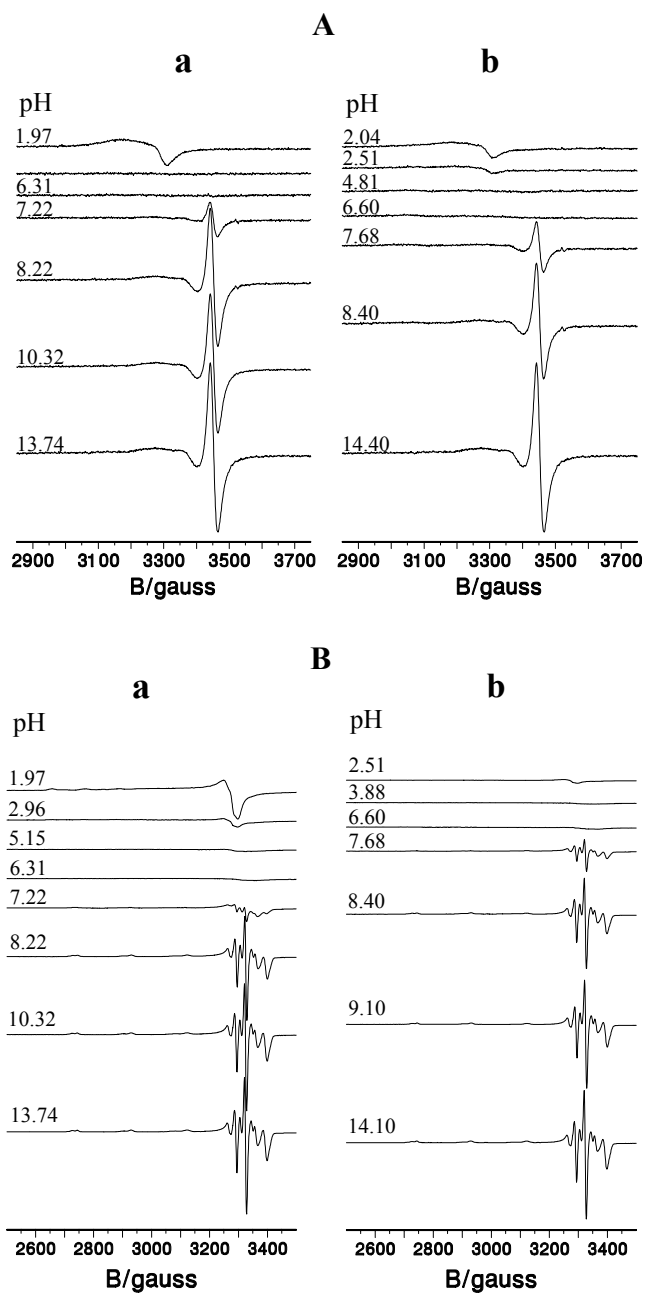

**Fig. S4.** ESR spectra for the Cu(II) – 1b equilibrium system A) in liquid solution at 298 K and B) in frozen solution at 77 K; a)  $T_{Cu}=1\text{ mM}$ ,  $T_L=1\text{ mM}$ ; b)  $T_{Cu}=0.5\text{ mM}$ ,  $T_L=1\text{ mM}$ .



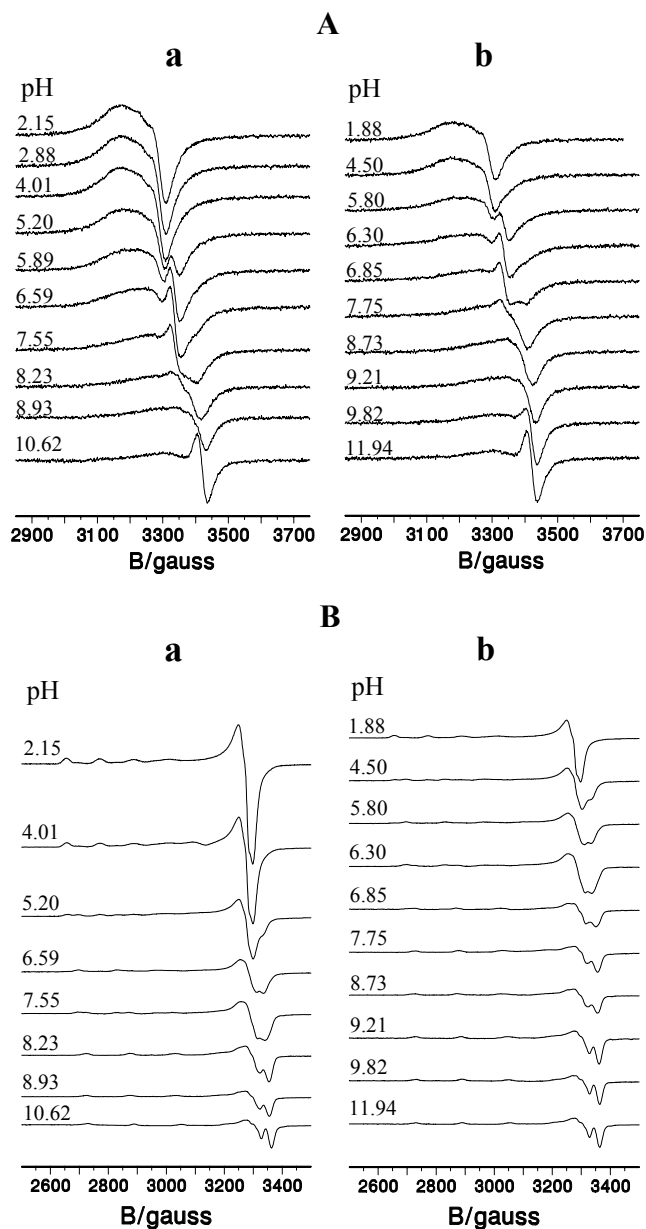

**Fig. S5.** ESR spectra for the Cu(II) – 1c equilibrium system in liquid solution A) at 298 K and B) in frozen solution at 77 K; a)  $T_{\text{Cu}}=1\text{mM}$ ,  $T_{\text{L}}=1\text{mM}$ ; b)  $T_{\text{Cu}}=0.5\text{mM}$ ,  $T_{\text{L}}=1\text{mM}$ .

- 
1. E.S Aazam, A. Fawazy, P.B. Hitchcock, *Acta Cryst.*, 2006, **E62**, o4285-o4287
